# Supplementary material for: Interventions to improve the use of EMRs in primary health care: a systematic review and meta-analysis
Source: HighWire-hosted journal article supplement (doi:10.1136/bmjhci-2019-000023), 2019-05-01
Supplement: bmjhci-2019-000023supp001_data_supplement.pdf [file bmjhci-2019-000023supp001_data_supplement.pdf]

## Appendix A: Complete Search Strategies

### Medline- Ovid

| #  | Search                                                                                                                                                                                                                                                                                                                                                                                                                                                   | Results |
|----|----------------------------------------------------------------------------------------------------------------------------------------------------------------------------------------------------------------------------------------------------------------------------------------------------------------------------------------------------------------------------------------------------------------------------------------------------------|---------|
| 1  | exp Medical Records Systems, Computerized/                                                                                                                                                                                                                                                                                                                                                                                                               | 29129   |
| 2  | ((electronic or computer* or online) adj2 (medical or health or patient) adj2 (record or records)).mp. [mp=title, abstract, original title, name of substance word, subject heading word, keyword heading word, protocol supplementary concept word, rare disease supplementary concept word, unique identifier]                                                                                                                                         | 22037   |
| 3  | 1 or 2                                                                                                                                                                                                                                                                                                                                                                                                                                                   | 37459   |
| 4  | Primary Health Care/ or Physicians, Primary Care/ or Family Practice/ or General Practice/ or General Practitioners/ or Nurse Practitioners/                                                                                                                                                                                                                                                                                                             | 135663  |
| 5  | (Primary health care or Primary healthcare or Primary medical care or Family practi* or Family medicine or General practi* or Family physician* or Family Doctor* or Nurse Practition*).mp. [mp=title, abstract, original title, name of substance word, subject heading word, keyword heading word, protocol supplementary concept word, rare disease supplementary concept word, unique identifier]                                                    | 207800  |
| 6  | 4 or 5                                                                                                                                                                                                                                                                                                                                                                                                                                                   | 208329  |
| 7  | Intervention Studies/ or Feedback/ or Health Knowledge, Attitudes, Practice/ or Computer User Training/ or workflow/ or Office Management/ or Practice Management, Medical/ or Decision Making, Computer-Assisted/ or "quality of health care"/ or exp quality improvement /                                                                                                                                                                             | 200385  |
| 8  | (Intervention Stud* or Computer user training or Work Flow or Office Management or Medical Practice Management or Computer assisted Decision making or Computer assisted Diagnosis or "meaningful use" or feedback or quality improvement).mp. [mp=title, abstract, original title, name of substance word, subject heading word, keyword heading word, protocol supplementary concept word, rare disease supplementary concept word, unique identifier] | 162119  |
| 9  | 7 or 8                                                                                                                                                                                                                                                                                                                                                                                                                                                   | 309976  |
| 10 | 3 and 6 and 9                                                                                                                                                                                                                                                                                                                                                                                                                                            | 823     |
| 11 | limit 10 to (english language and yr="1970 -Current")                                                                                                                                                                                                                                                                                                                                                                                                    | 709     |

### EMBASE

| # | Search                                                                                                                                                                                                                                         | Results |
|---|------------------------------------------------------------------------------------------------------------------------------------------------------------------------------------------------------------------------------------------------|---------|
| 1 | exp electronic medical record/                                                                                                                                                                                                                 | 32147   |
| 2 | ((electronic or computer* or online) adj2 (medical or health or patient) adj2 (record or records)).mp. [mp=title, abstract, heading word, drug trade name, original title, device manufacturer, drug manufacturer, device trade name, keyword] | 40575   |
| 3 | 1 or 2                                                                                                                                                                                                                                         | 40738   |
| 4 | primary health care/ or general practice/ or general practitioner/ or nurse practitioner/ or family nurse practitioner/                                                                                                                        | 188427  |
| 5 | (Primary health care or Primary healthcare or Primary medical care or Family practi* or Family medicine or General practi* or Family physician* or Primary care physician* or Family Doctor* or Nurse                                          | 295406  |

|    |                                                                                                                                                                                                                                                                                                                                                                                        |        |
|----|----------------------------------------------------------------------------------------------------------------------------------------------------------------------------------------------------------------------------------------------------------------------------------------------------------------------------------------------------------------------------------------|--------|
|    | Practition*).mp. [mp=title, abstract, heading word, drug trade name, original title, device manufacturer, drug manufacturer, device trade name, keyword]                                                                                                                                                                                                                               |        |
| 6  | 4 or 5                                                                                                                                                                                                                                                                                                                                                                                 | 295406 |
| 7  | intervention study/ or attitude to health/ or exp knowledge management/ or "meaningful use criteria"/ or workflow/ or computer assisted diagnosis/                                                                                                                                                                                                                                     | 158262 |
| 8  | (Intervention Stud* or Computer user training or Work Flow or Office Management or Medical Practice Management or Computer assisted Decision making or Computer assisted Diagnosis or "meaningful use" or feedback or quality improvement).mp. [mp=title, abstract, heading word, drug trade name, original title, device manufacturer, drug manufacturer, device trade name, keyword] | 243833 |
| 9  | 7 or 8                                                                                                                                                                                                                                                                                                                                                                                 | 336743 |
| 10 | 3 and 6 and 9                                                                                                                                                                                                                                                                                                                                                                          | 887    |
| 11 | limit 10 to (english language and yr="1970 -Current")                                                                                                                                                                                                                                                                                                                                  | 791    |

## CINAHL

| #  | Search                                                                                                                                                                                                                                   | Results |
|----|------------------------------------------------------------------------------------------------------------------------------------------------------------------------------------------------------------------------------------------|---------|
| 1  | (MH "Medical Records, Personal") OR (MH "Computerized Patient Record")                                                                                                                                                                   | 11,234  |
| 2  | (electronic OR computer* OR online) N2 (medical OR health OR patient) N2 (record OR records)                                                                                                                                             | 13,390  |
| 3  | (S1 OR S2)                                                                                                                                                                                                                               | 13,719  |
| 4  | (MH "Family Nurse Practitioners") OR (MH "Nurse Practitioners") OR (MH "Family Practice") OR (MH "Physicians, Family") OR (MH "Primary Health Care")                                                                                     | 57,922  |
| 5  | Primary health care or Primary healthcare or Primary medical care or Family practi* or Family medicine or General practi* or Family physician* or Family Doctor* or Nurse Practition*                                                    | 82,062  |
| 6  | (S4 OR S5)                                                                                                                                                                                                                               | 82,062  |
| 7  | (MH "Knowledge Management+") OR (MH "Meaningful Use") OR (MH "Computer User Training")OR (MH "Decision Support Systems, Clinical") OR (MH "Decision Making, Computer Assisted") OR (MH "Attitude to Health")                             | 1,688   |
| 8  | Intervention Stud* or Computer user training or Work Flow or Office Management or Medical Practice Management or Computer assisted Decision making or Computer assisted Diagnosis or "meaningful use" or feedback or quality improvement | 61,868  |
| 9  | (S7 OR S8)                                                                                                                                                                                                                               | 63,268  |
| 10 | (S3 AND S6 AND S9)                                                                                                                                                                                                                       | 322     |

## Web of Science

| # | Search                                                                                                                                                                                                | Results |
|---|-------------------------------------------------------------------------------------------------------------------------------------------------------------------------------------------------------|---------|
| 1 | TS=("Electronic medical record*") OR TS=("Electronic health record*") OR TS=("Computerized patient record*")<br><br><i>Indexes=SCI-EXPANDED, SSCI, A&amp;HCI, CPCI-S, CPCI-SSH Timespan=All years</i> | 12,811  |

|   |                                                                                                                                                                                                                                                                                                                                                                                            |         |
|---|--------------------------------------------------------------------------------------------------------------------------------------------------------------------------------------------------------------------------------------------------------------------------------------------------------------------------------------------------------------------------------------------|---------|
| 2 | TS=("Primary Health Care") or TS=("Primary Care Physicians") or TS=("Family Practice") or TS=("General Practice") or TS=("General Practitioners") or TS=("Nurse Practitioners")<br><br><i>Indexes=SCI-EXPANDED, SSCI, A&amp;HCI, CPCI-S, CPCI-SSH Timespan=All years</i>                                                                                                                   | 79,091  |
| 3 | TS=("Intervention Studies") or TS=(Feedback) or TS=("Computer User Training") or TS=(workflow) or TS=("Office Management") or TS=("Practice Management") or TS=("Computer Assisted Decision Making") or TS=("meaningful use") or TS=("quality improvement") or TS=("Computer assisted Diagnosis")<br><br><i>Indexes=SCI-EXPANDED, SSCI, A&amp;HCI, CPCI-S, CPCI-SSH Timespan=All years</i> | 350,825 |
| 4 | #3 AND #2 AND #1<br><br><i>Indexes=SCI-EXPANDED, SSCI, A&amp;HCI, CPCI-S, CPCI-SSH Timespan=All years</i>                                                                                                                                                                                                                                                                                  | 141     |
| 5 | (#4) AND LANGUAGE: (English)<br><br><i>Indexes=SCI-EXPANDED, SSCI, A&amp;HCI, CPCI-S, CPCI-SSH Timespan=1970-2015</i>                                                                                                                                                                                                                                                                      | 140     |

## Cochrane Library

| #  | Search                                                                     | Results |
|----|----------------------------------------------------------------------------|---------|
| 1  | MeSH descriptor: [Medical Records Systems, Computerized] explode all trees | 439     |
| 2  | MeSH descriptor: [Primary Health Care] explode all trees                   | 4022    |
| 3  | MeSH descriptor: [General Practice] this term only                         | 209     |
| 4  | MeSH descriptor: [General Practitioners] explode all trees                 | 95      |
| 5  | MeSH descriptor: [Nurse Practitioners] this term only                      | 316     |
| 6  | MeSH descriptor: [Intervention Studies] this term only                     | 2306    |
| 7  | MeSH descriptor: [Feedback] this term only                                 | 979     |
| 8  | MeSH descriptor: [Health Knowledge, Attitudes, Practice] this term only    | 3916    |
| 9  | MeSH descriptor: [Computer User Training] explode all trees                | 47      |
| 10 | MeSH descriptor: [Workflow] explode all trees                              | 13      |
| 11 | MeSH descriptor: [Office Management] explode all trees                     | 70      |
| 12 | MeSH descriptor: [Decision Making, Computer-Assisted] explode all trees    | 3751    |
| 13 | MeSH descriptor: [Quality Improvement] 1 tree(s) exploded                  | 49      |
| 14 | Enter terms for search #2 or #3 or #4 or #5                                | 4485    |

|    |                                                                                                  |       |
|----|--------------------------------------------------------------------------------------------------|-------|
| 15 | Enter terms for search #6 or #7 or #8 or #9 or #10 or #11 or #12 or #13                          | 10975 |
| 16 | Enter terms for search "electronic medical records"                                              | 183   |
| 17 | Enter terms for search "electronic health records"                                               | 213   |
| 18 | Enter terms for search "computerized medical records"                                            | 21    |
| 19 | Enter terms for search "electronic patient records"                                              | 28    |
| 20 | Enter terms for search "primary health care"                                                     | 4725  |
| 21 | Enter terms for search "primary healthcare"                                                      | 341   |
| 22 | Enter terms for search "Primary medical care"                                                    | 1879  |
| 23 | Enter terms for search "Family practice"                                                         | 3579  |
| 24 | Enter terms for search "Family medicine"                                                         | 1807  |
| 25 | Enter terms for search "General practice"                                                        | 5345  |
| 26 | Enter terms for search "Family physician"                                                        | 612   |
| 27 | Enter terms for search "Family Doctor"                                                           | 179   |
| 28 | Enter terms for search "Nurse Practitioner"                                                      | 544   |
| 29 | Enter terms for search "Intervention Study"                                                      | 5584  |
| 30 | Enter terms for search "Computer user training"                                                  | 48    |
| 31 | Enter terms for search "Work Flow"                                                               | 25    |
| 32 | Enter terms for search "Office Management"                                                       | 16    |
| 33 | Enter terms for search "Medical Practice Management"                                             | 3     |
| 34 | Enter terms for search "Computer assisted Decision making"                                       | 5     |
| 35 | Enter terms for search "Computer assisted Diagnosis"                                             | 108   |
| 36 | Enter terms for search "meaningful use"                                                          | 21    |
| 37 | Enter terms for search "feedback"                                                                | 8445  |
| 38 | Enter terms for search "quality improvement"                                                     | 1287  |
| 39 | Enter terms for search #1 or #16 or #17 or #18 or #19                                            | 417   |
| 40 | Enter terms for search #14 or #20 or #21 or #22 or #23 or #24 or #25 or #26 or #27 or #28        | 15661 |
| 41 | Enter terms for search #15 or #29 or #30 or #31 or #32 or #33 or #34 or #35 or #36 or #37 or #38 | 23975 |
| 42 | Enter terms for search #40 and #41 and #42                                                       | 80    |
